# Supplementary material for: Genome-wide detection of human intronic AG-gain variants located between splicing branchpoints and canonical splice acceptor sites
Source: PubMed Central journal article supplement (PMC10655562; doi:10.1073/pnas.2314225120), 2023-11-06

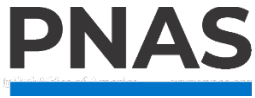

## **Supplementary Information for**

### **Genome-wide detection of human intronic AG-gain variants located between splicing branchpoints and canonical splice acceptor sites**

Peng Zhang<sup>\*</sup>, Matthieu Chaldebas<sup>#</sup>, Masato Ogishi<sup>#</sup>, Fahd Al Qureshah<sup>#</sup>, Khoren Ponsin, Yi Feng, Darawan Rinchai, Baptiste Milisavljevic, Ji Eun Han, Marcela Moncada-Velez, Sevgi Keles, Bernd Schröder, Peter D. Stenson, David N. Cooper, Aurélie Cobat, Bertrand Boisson, Qian Zhang, Stéphanie Boisson-Dupuis<sup>@</sup>, Laurent Abel<sup>@</sup>, Jean-Laurent Casanova<sup>@,\*</sup>

<sup>#,@</sup> These authors contributed equally.

<sup>\*</sup> To whom correspondence should be addressed:

Peng Zhang ([pzhang@rockefeller.edu](mailto:pzhang@rockefeller.edu))

Jean-Laurent Casanova ([casanova@rockefeller.edu](mailto:casanova@rockefeller.edu))

#### **This PDF file includes:**

Figures S1 to S7

#### **Other supplementary materials for this manuscript include the following:**

Datasets S1 to S4

**Figure S1: Eight pathogenic missplicing variants that were originally reported to disrupt branchpoints (BP).** We found these variants actually served to create AG dinucleotides in the region between the BP and the downstream splice acceptor site (ACC).

|                                    | BP              | Variant          | ACC              | Exon               |
|------------------------------------|-----------------|------------------|------------------|--------------------|
| <b>FAS   g.90770494A&gt;G</b>      |                 |                  |                  |                    |
| wt:                                | TGCTTATTTTC     | ATATAAAATGTCCA   | TGTTCCAACCTAC    | AGGATCCAGAT        |
| mt:                                | TGCTTATTTTC     | ATATAAAATGTCCA   | AGTGTTTCCAACCTAC | AGGATCCAGAT        |
| <b>FBN2   g.127671284T&gt;C</b>    |                 |                  |                  |                    |
| wt:                                | AAGCAGACCTG     | ACAATGTGGTTGCA   | TGCTGTTTTTTCAC   | AGATATTGATGA       |
| mt:                                | AAGCAGACCTG     | ACAATGTGGTTGCA   | AGTGTTTTTTTCAC   | AGATATTGATGA       |
| <b>HEXB   g.74014605A&gt;G</b>     |                 |                  |                  |                    |
| wt:                                | TCTAGGCCTAATA   | TATGTATTGCA      | ATTTGTAACGTTAAT  | AGCTTGCGCC         |
| mt:                                | TCTAGGCCTAATA   | TATGTATTGCA      | AGTTTGTAACGTTAAT | AGCTTGCGCC         |
| <b>ITGB2   g.46321660A&gt;C</b>    |                 |                  |                  |                    |
| wt:                                | GCCTGCCACCTCCCC | AGCCCCCTCCAT     | TGTGCCCTGC       | AGGCTTCGGGTCCTT    |
| mt:                                | GCCTGCCACCTCCCC | AGCCCCCTCCAT     | AGGTGCCCTGC      | AGGCTTCGGGTCCTT    |
| <b>LIPC   g.58830518A&gt;G</b>     |                 |                  |                  |                    |
| wt:                                | GATGCCAGGCTA    | AGCACCGTCCCCA    | ATCTTATATTGC     | AGAGCCATTTGGA      |
| mt:                                | GATGCCAGGCTA    | AGCACCGTCCCCA    | AGTCTTATATTGC    | AGAGCCATTTGGA      |
| <b>SLC25A20   g.48921567A&gt;C</b> |                 |                  |                  |                    |
| wt:                                | CTGTAAACAGCTTCT | GCCTTCTGTGAT     | TCCTTGC          | AGGGCATCACGGGGCTA  |
| mt:                                | CTGTAAACAGCTTCT | GCCTTCTGTGAT     | AGTCCTTGC        | AGGGCATCACGGGGCTA  |
| <b>USH2A   g.216040529T&gt;C</b>   |                 |                  |                  |                    |
| wt:                                | AGTAGAAATTC     | ATATACTTTTTTTAA  | CAAAACAACATTTT   | AGGTTTACAA         |
| mt:                                | AGTAGAAATTC     | ATATACTTTTTTTAA  | AGCAAAACAACATTTT | AGGTTTACAA         |
| <b>XPC   g.14209889A&gt;T</b>      |                 |                  |                  |                    |
| wt:                                | ACTATTACTG      | ATTTTTAAAAATGCTT | GTTGAT           | AGAACTTAGTGAGCCTGT |
| mt:                                | ACTATTACTG      | ATTTTTAAAAATGCTA | AGTGTGATAGA      | AGAACTTAGTGAGCCTGT |

**Figure S2: Pyrimidine content and prediction of RNA stem-loop structures.** (a) Pyrimidine content in three zones of interest. (b) Proportion of naturally occurring AG dinucleotides in zone 1 that could be concealed within the predicted RNA stem-loop structures. (c) Examples of RNA stem-loop structures that conceal AG dinucleotides from exposure to other base-pairing (blue arrow points in the 3' direction).

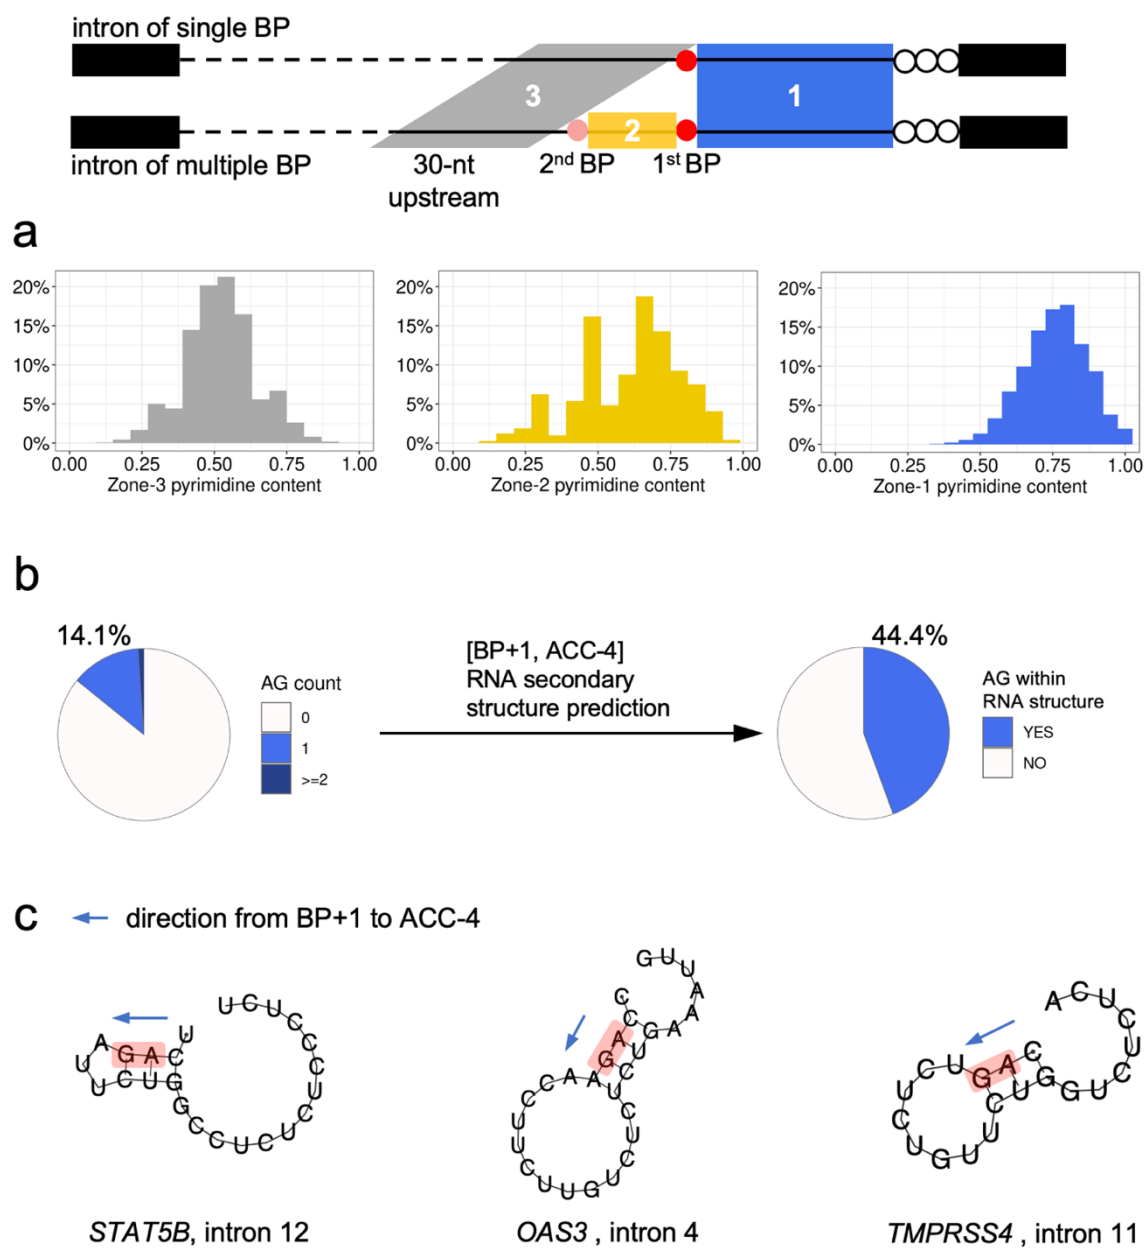

**Figure S3: Schematic of AGAIN software for generating protein sequences and HGVS annotations.** AGAIN focuses on the two main misspliced outcomes by AG-gain variants: new acceptor site at the newly introduced AG (NEW\_ACC), and complete exon skipping (EXON\_SKIP).

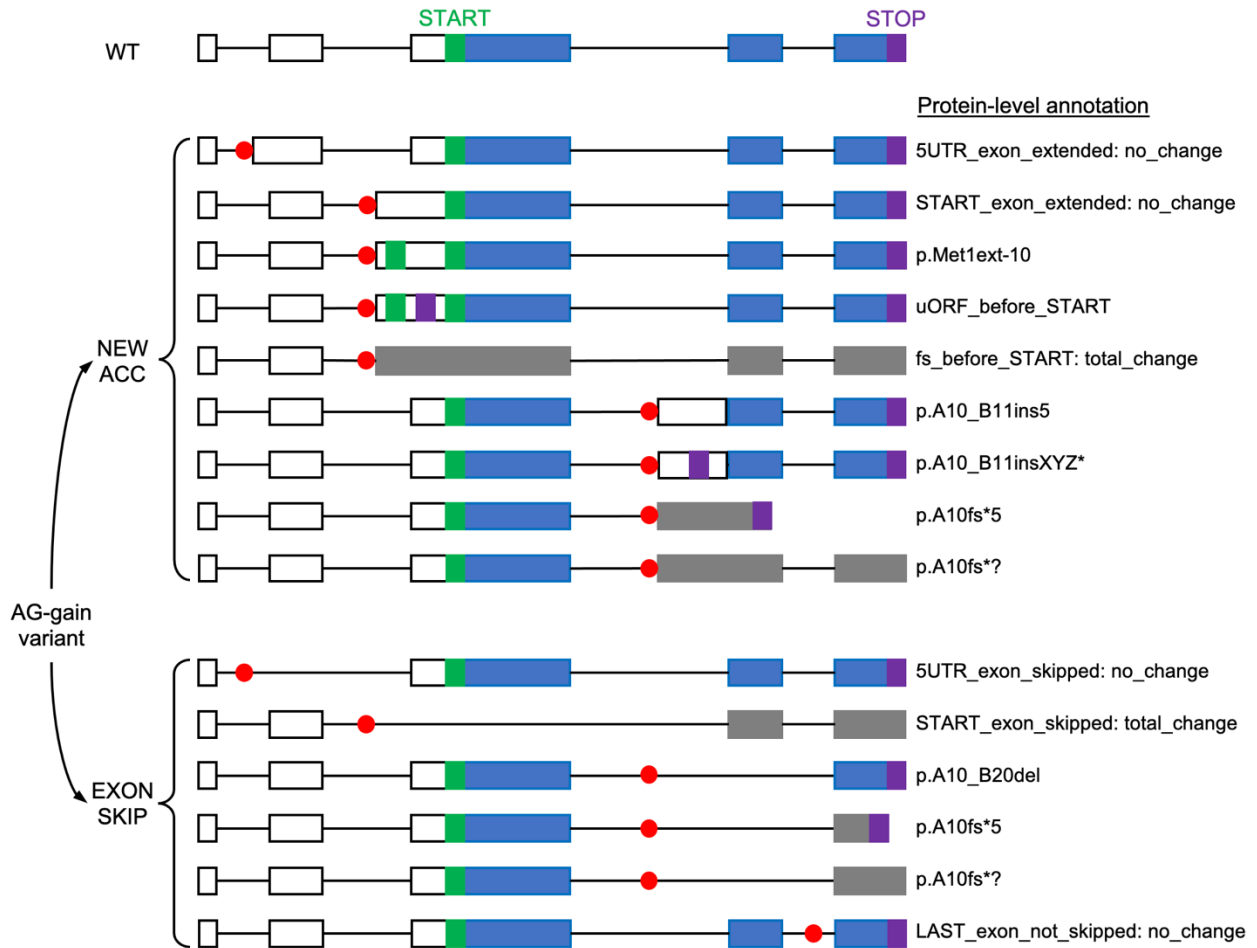

**Figure S4: Analysis of 350 published pathogenic AG-gain variants in zone 1.** (a) Mode of inheritance of these pathogenic intronic AG-gain variants in terms of the associated clinical phenotype (AD: autosomal dominant, AR autosomal recessive, ADAR: autosomal dominant and recessive, XLD: X-linked dominant, XLR: X-linked recessive, UKN: unknown.). (b) Missplicing outcomes and their proportions. (c/d) The distance from AG-gain variants to BP/ACC, in which the variants that created new acceptor sites are highlighted in red, and the variants that resulted in complete exon skipping are highlighted in green.

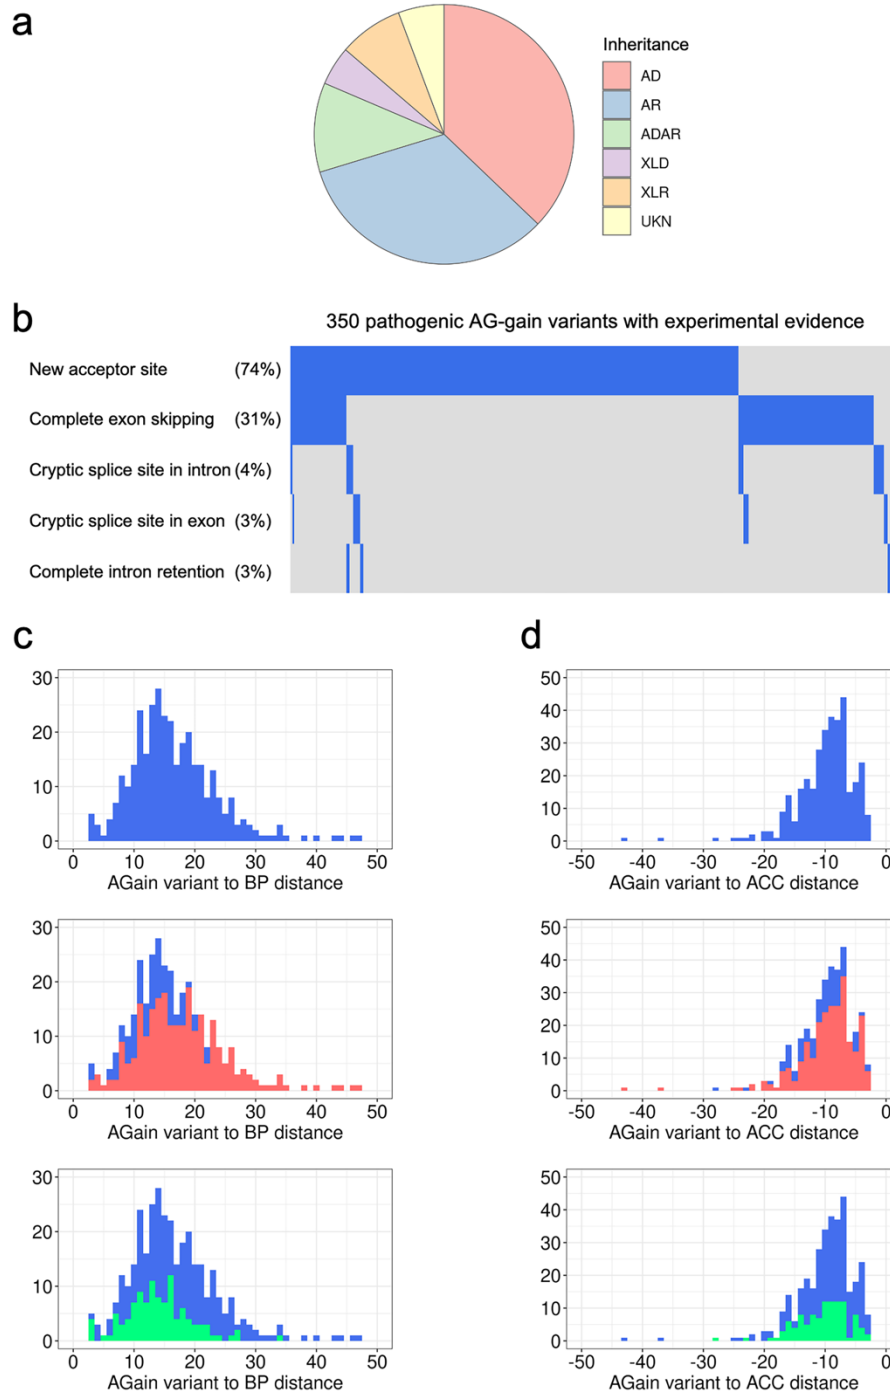

**Figure S5: MAF category comparison in the human population.** The proportion of six groups of intronic variant (AG-gain variants, BP variants, essential acceptor splice site variants (ACC-1 and ACC-2), all other variants in the BP-ACC region, and one million random intronic variants) in different MAF categories (singleton, rare or common), based on (a) gnomAD v2 of WES data and (b) gnomAD v3 of WGS data.

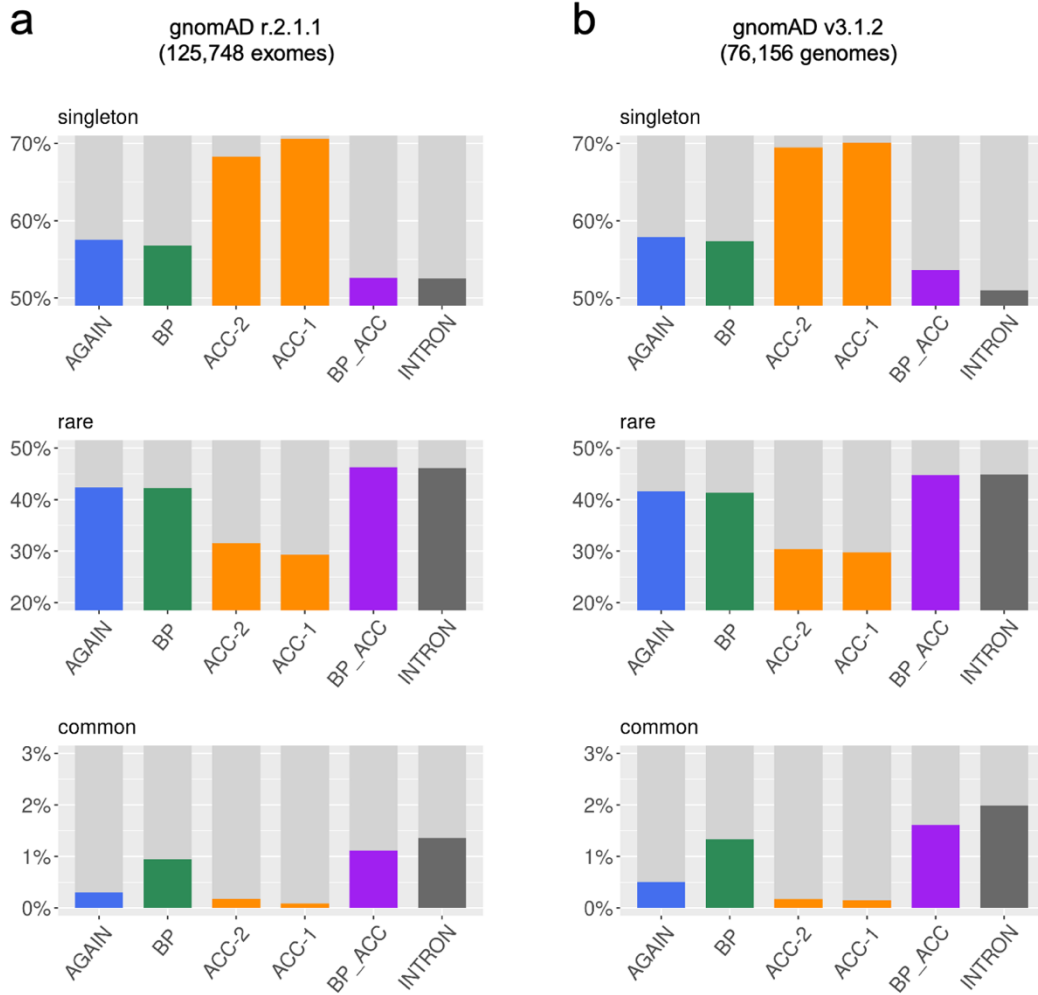

**Figure S6. Normal *SPPL2A* mRNA expression levels in a patient with mycobacterial disease who carries a homozygous intronic AG-gain variant of *SPPL2A*.** Total mRNA extracted from cryopreserved peripheral blood mononuclear cells from the patient (homozygous), the patient's sister (heterozygous) and two unrelated controls were used for RT-qPCR. Two different TaqMan probes for *SPPL2A* mRNA were used. Delta Ct values compared to *GUSB* (internal control) from three technical replicate reactions are shown. Bars represent the mean and standard error of the mean.

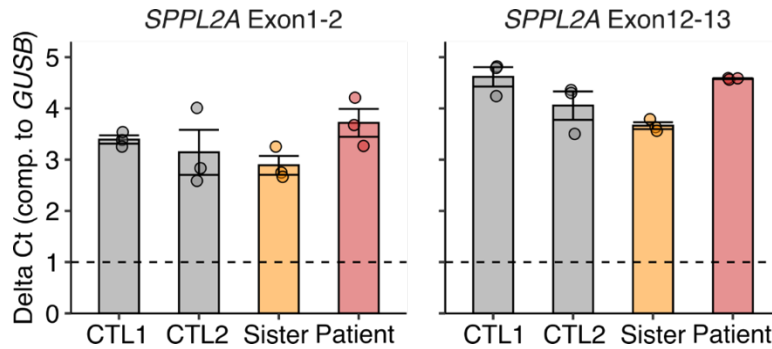

**Figure S7: Genome-wide detection of 9 intronic AG-gain variants from WES data, and validation of their missplicing consequences from their paired RNA-seq data. (Green arrows indicate the locations of the AG-gain variants)**

| VAR | GENE   | CHR   | POS       | REF | ALT | AGAIN YAG | AGAIN BP_DIST | AGAIN ACC_DIST | AGAIN SCORE | RNAseq Evidence                 |
|-----|--------|-------|-----------|-----|-----|-----------|---------------|----------------|-------------|---------------------------------|
| #1  | CAPN3  | chr15 | 42695919  | C   | G   | YES       | 8             | -19            | 5           | intron retention                |
| #2  | COL4A4 | chr2  | 228012304 | T   | C   | YES       | 15            | -3             | 5           | new acceptor                    |
| #3  | GNPDA2 | chr4  | 44724274  | T   | C   | YES       | 12            | -14            | 4           | exon skipping, intron retention |
| #4  | GPD2   | chr2  | 157425324 | T   | A   | YES       | 12            | -11            | 5           | intron retention                |
| #5  | KIF19  | chr17 | 72340351  | T   | A   | YES       | 15            | -9             | 5           | exon skipping                   |
| #6  | MEGF8  | chr19 | 42862292  | C   | G   | YES       | 13            | -3             | 5           | new acceptor                    |
| #7  | NOTCH3 | chr19 | 15299990  | C   | T   | YES       | 15            | -3             | 5           | new acceptor                    |
| #8  | SSR1   | chr6  | 7310269   | A   | C   | YES       | 20            | -6             | 5           | new acceptor                    |
| #9  | TBCD   | chr17 | 80895920  | G   | A   | YES       | 13            | -3             | 5           | new acceptor                    |

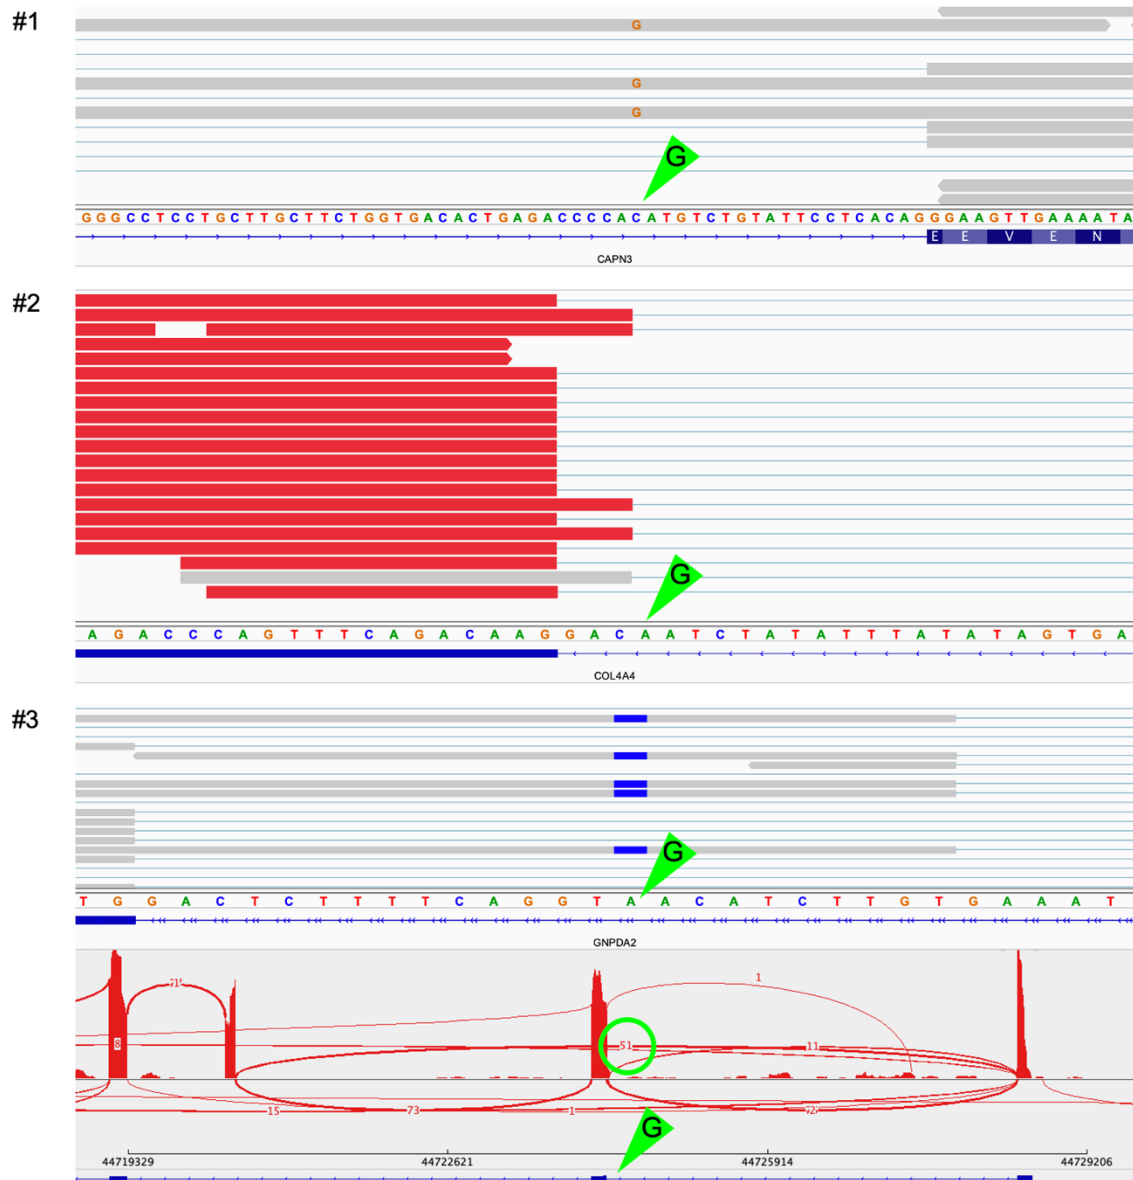



AGAIN: detection of intronic AG-gain variants (suppl figures)

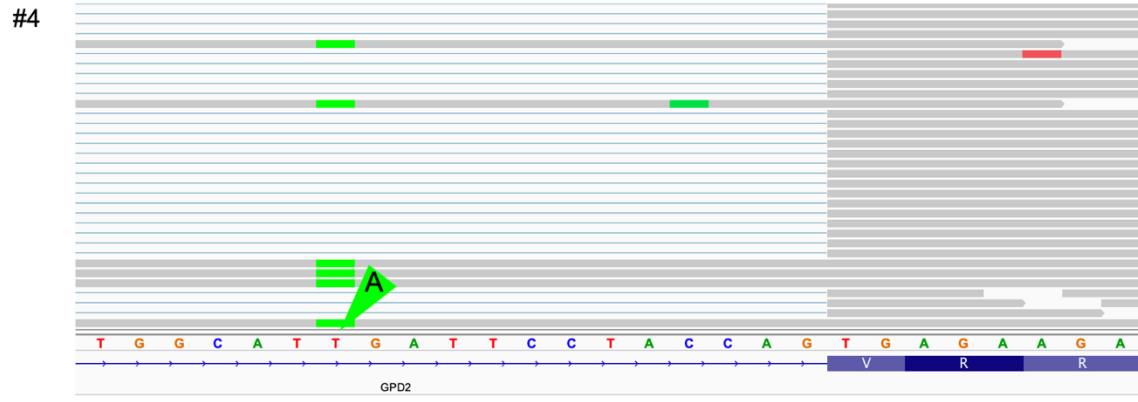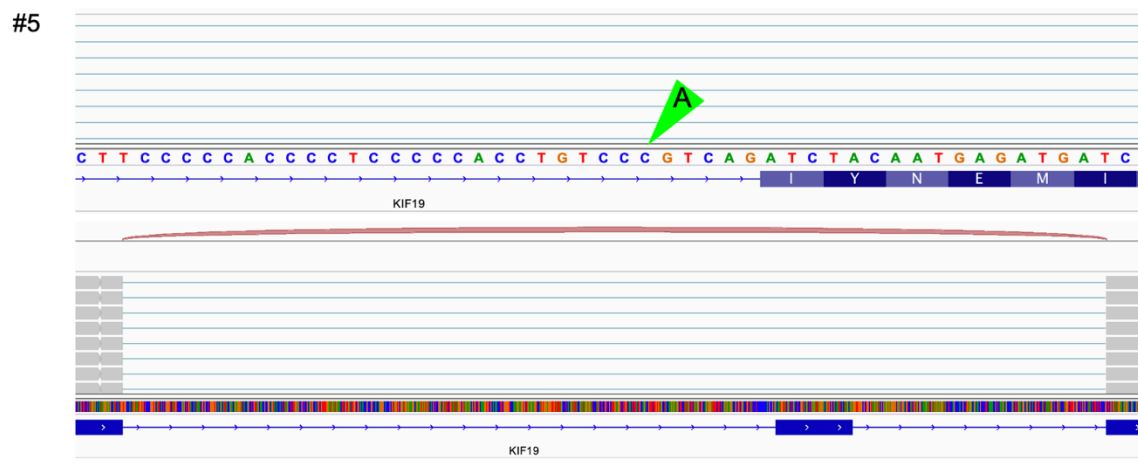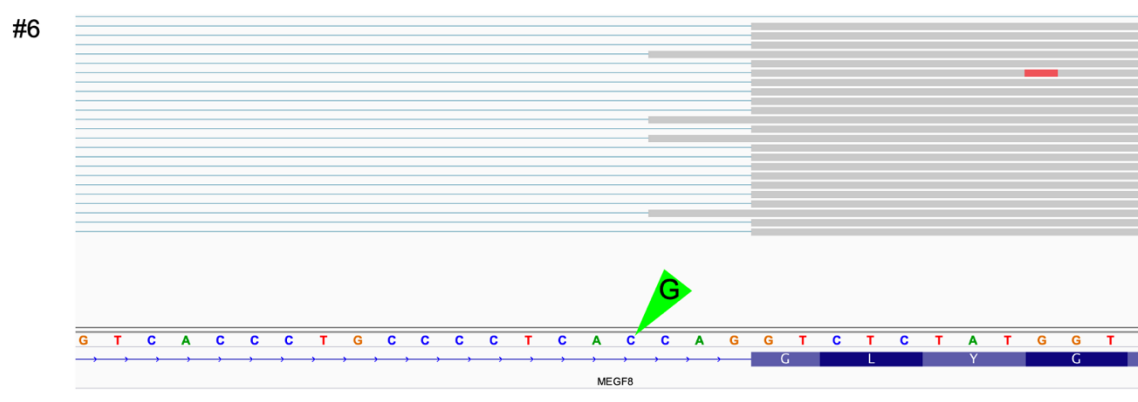

AGAIN: detection of intronic AG-gain variants (suppl figures)

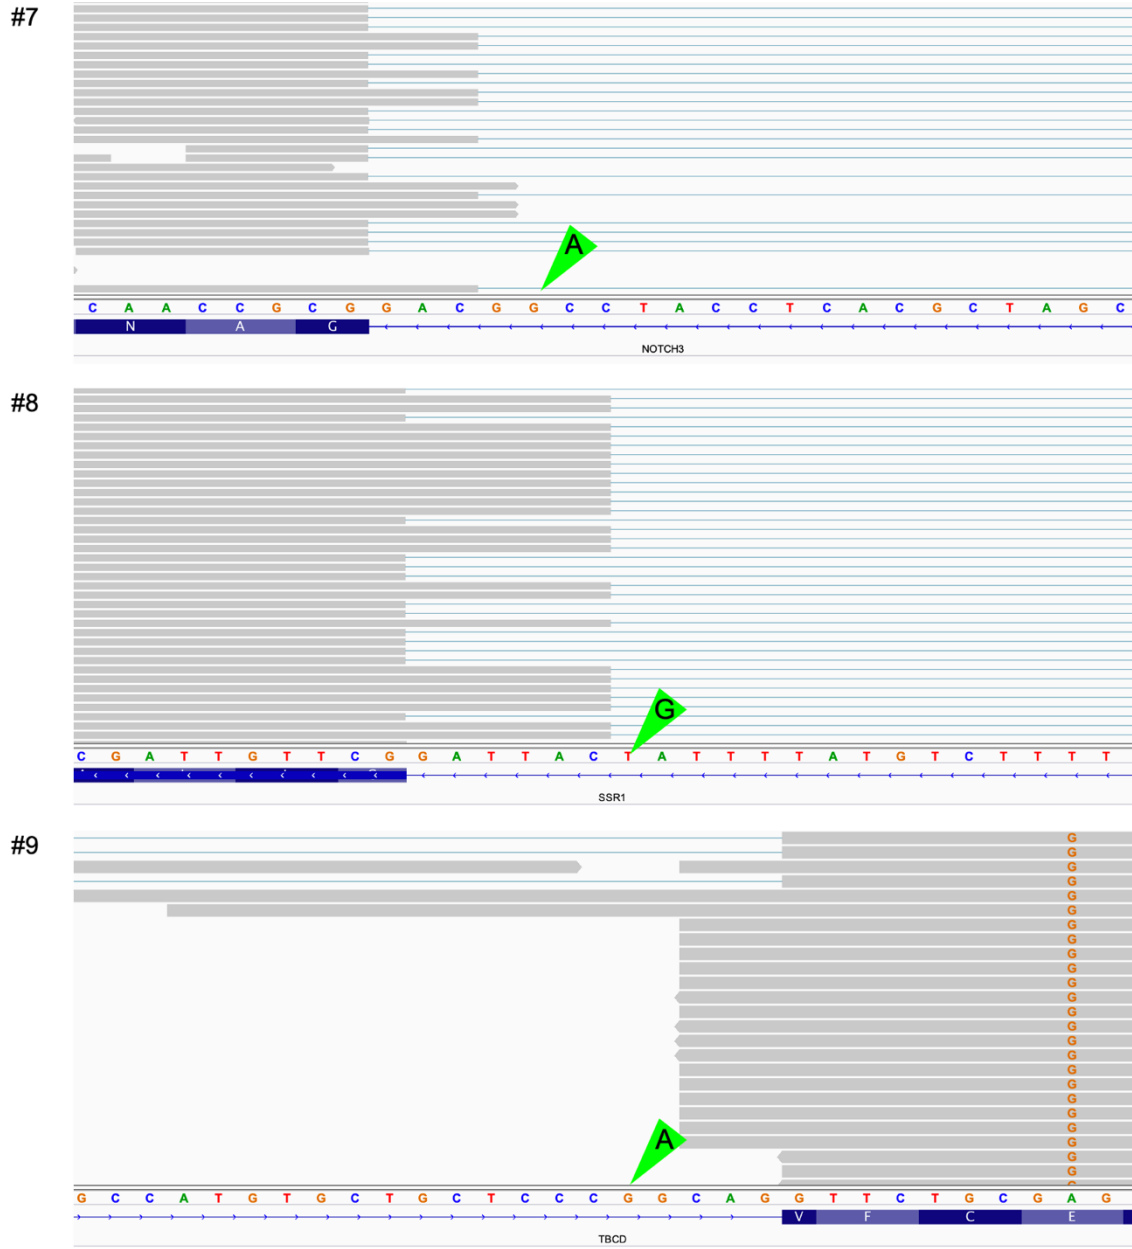

Supplement: pnas.2314225120.sapp.pdf [file pnas.2314225120.sapp.pdf]
